1 **Hydrogen sulfide release via the ACE inhibitor Zofenopril prevents intimal hyperplasia in human**  
2 **vein segments and in a mouse model of carotid artery stenosis**

3 Diane MACABREY<sup>a,b,§</sup>, Céline DESLARZES-DUBUIS<sup>a,b,§</sup>, Alban LONGCHAMP<sup>a,b</sup>, Martine LAMBELET<sup>a,b</sup>,  
4 Charles K. OZAKI<sup>c</sup>, Jean-Marc CORPATAUX<sup>a,b</sup>, Florent ALLAGNAT<sup>a,b,#</sup> and Sébastien DÉGLISE<sup>a,b,#</sup>

5

6 <sup>a</sup>Department of Vascular Surgery, Lausanne University Hospital, Switzerland

7 <sup>b</sup>Department of Biomedical Sciences, University of Lausanne, Switzerland

8 <sup>c</sup>Department of Surgery and the Heart and Vascular Center, Brigham and Women's Hospital and  
9 Harvard Medical School, Boston, MA, USA.

10 <sup>§</sup> *These authors have equally contributed as first authors*

11 <sup>#</sup> *These authors have equally contributed as senior authors*

12

13 **Running title:** Zofenopril inhibits intimal hyperplasia

14 Word count: 3769

15 Number of Figures: 6

16

17 **Original article/basic research**

18

19 Corresponding Author:

20 Florent Allagnat

21 CHUV-Service de chirurgie vasculaire

22 Département des Sciences Biomédicales

23 Bugnon 7A, 1005 Lausanne, Suisse

24 +41216925582

25 Florent.allagnat@chuv.ch

26

27

28

29 **Graphical Abstract**

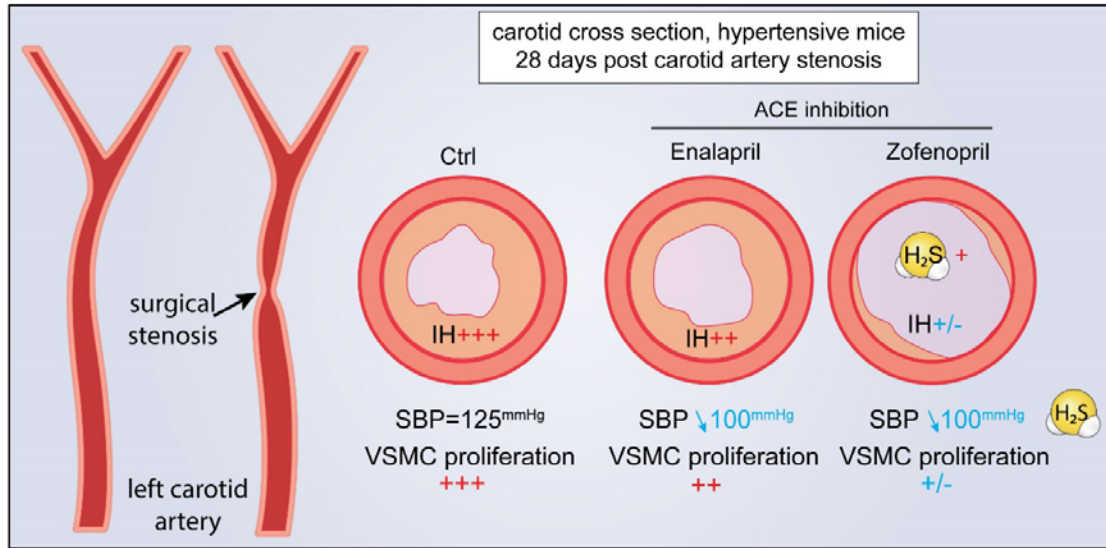

30

31

32

33 What this paper adds

34 The current strategies to reduce intimal hyperplasia (IH) principally rely on local drug delivery, in  
35 endovascular approach. The oral angiotensin converting enzyme inhibitor (ACEi) Zofenopril has  
36 additional effects compared to other non-sulphyhydrated ACEi to prevent intimal hyperplasia and  
37 restenosis. Given the number of patients treated with ACEi worldwide, these findings call for further  
38 prospective clinical trials to test the benefits of sulphyhydrated ACEi over classic ACEi for the  
39 prevention of restenosis in hypertensive patients.

40

41 **Abstract**

42 **Objectives**

43 Hypertension is a major risk factor for intimal hyperplasia (IH) and restenosis following  
44 vascular and endovascular interventions. Pre-clinical studies suggest that hydrogen sulfide (H<sub>2</sub>S), an  
45 endogenous gasotransmitter, limits restenosis. While there is no clinically available pure H<sub>2</sub>S  
46 releasing compound, the sulfhydryl-containing angiotensin-converting enzyme inhibitor Zofenopril is  
47 a source of H<sub>2</sub>S. Here, we hypothesized that Zofenopril, due to H<sub>2</sub>S release, would be superior to  
48 other non-sulphydryl containing angiotensin converting enzyme inhibitor (ACEi), in reducing intimal  
49 hyperplasia.

50 **Materials**

51 Spontaneously hypertensive male Cx40 deleted mice (Cx40<sup>-/-</sup>) or WT littermates were  
52 randomly treated with Enalapril 20 mg (Mepha Pharma) or Zofenopril 30 mg (Mylan SA). Discarded  
53 human vein segments and primary human smooth muscle cells (SMC) were treated with the active  
54 compound Enalaprilat or Zofenoprilat.

55 **Methods**

56 IH was evaluated in mice 28 days after focal carotid artery stenosis surgery and in human  
57 vein segments cultured for 7 days *ex vivo*. Human primary smooth muscle cell (SMC) proliferation  
58 and migration were studied *in vitro*.

59 **Results**

60 Compared to control animals (intima/media thickness=2.3±0.33), Enalapril reduced IH in Cx40<sup>-/-</sup>  
61 hypertensive mice by 30% (1.7±0.35; p=0.037), while Zofenopril abrogated IH (0.4±0.16; p<.0015 vs.  
62 Ctrl and p>0.99 vs. sham-operated Cx40<sup>-/-</sup> mice). In WT normotensive mice, enalapril had no effect  
63 (0.9665±0.2 in control vs 1.140±0.27; p>.99), while Zofenopril also abrogated IH (0.1623±0.07,  
64 p<.008 vs. Ctrl and p>0.99 vs. sham-operated WT mice). Zofenoprilat, but not Enalaprilat, also  
65 prevented intimal hyperplasia in human veins segments *ex vivo*. The effect of Zofenopril on carotid  
66 and SMC correlated with reduced SMC proliferation and migration. Zofenoprilat inhibited the MAPK  
67 and mTOR pathways in SMC and human vein segments.

68 **Conclusion**

69 Zofenopril provides extra beneficial effects compared to non-sulphydryl ACEi to reduce SMC  
70 proliferation and restenosis, even in normotensive animals. These findings may hold broad clinical  
71 implications for patients suffering from vascular occlusive diseases and hypertension.

72 **Keywords:** Intimal hyperplasia; smooth muscle cells; proliferation; hydrogen sulfide; zofenopril;  
73 hypertension; ACE inhibitor; restenosis

74

75

76

77 **Abbreviations**

78 ACE: angiotensin converting enzyme

79 CAS: carotid artery stenosis

80 Cx40: connexin 40

81 H<sub>2</sub>S: hydrogen sulfide

82 IH: intimal hyperplasia

83 PCNA: proliferating cell nuclear antigen

84 SBP: systolic blood pressure

85 VSMC: vascular smooth muscle cells

86 VGEL: Van Gieson elastic lamina

87

## 88 INTRODUCTION

89 Intimal hyperplasia (IH) remains the major cause of restenosis following vascular surgery,  
90 leading to potential limb loss and death. IH develops in response to vessel injury, leading to  
91 inflammation, vascular smooth muscle cells (SMCs) dedifferentiation, migration, proliferation and  
92 secretion of extra-cellular matrix. Despite decades of research, there is no effective medication to  
93 prevent restenosis<sup>1</sup>. The only validated therapy against intimal hyperplasia is the local drug-delivery  
94 strategy, especially used in endovascular approach. However, this strategy seems to be limited in  
95 time<sup>2</sup>, speaking for other complementary oral treatment, targeting either steps involved in IH, such  
96 as SMC proliferation, or risk factors for restenosis such as hypertension.

97 Hydrogen Sulfide (H<sub>2</sub>S) is an endogenously produced gasotransmitter<sup>3</sup>. Pre-clinical studies  
98 have shown that H<sub>2</sub>S has cardiovascular protective properties<sup>4</sup>, including reduction of IH<sup>5-7</sup>, possibly  
99 via decreased VSMC proliferation<sup>6,8</sup>. However, there is currently no clinically approved H<sub>2</sub>S donor<sup>9</sup>.

100 Hypertension is a known risk factor for restenosis and bypass failure<sup>10</sup>. Current guidelines  
101 recommend angiotensin converting enzyme inhibitors (ACEi) as first line therapy for the treatment  
102 of essential hypertension<sup>11</sup>. Although various ACEi reduce restenosis in rodent models<sup>12</sup>, prospective  
103 clinical trials failed to prove efficacy of the ACEi Quinapril<sup>13</sup> or Cilazapril<sup>14,15</sup> for the prevention of  
104 restenosis at 6 months following coronary angioplasty. Several *in vitro* studies suggest that the ACEi  
105 Zofenopril, due to a sulfhydryl moiety in its structure, releases H<sub>2</sub>S<sup>16-18</sup>. The therapeutic potential of  
106 sulfhydryl ACEi Zofenopril has never been tested in the context of restenosis.

107 The purpose of this study was to test whether Zofenopril, due to its H<sub>2</sub>S-releasing properties,  
108 is superior to non-sulfhydryl ACEi in limiting IH in a surgical mouse model of IH *in vivo*, and in an *ex*  
109 *vivo* model of IH in human vein culture. Zofenopril was systematically compared to the non-  
110 sulfhydrated ACEi Enalapril.

111

## 112 MATERIALS and METHODS

### *Materials*

113 Drugs and reagents are described in supplemental table S1. Datasets are available at  
114 <https://doi.org/10.5281/zenodo.5017874>

### *Experimental group design*

115 All experiments were performed using 8 to 10 weeks old male Cx40-deleted mice (Cx40<sup>-/-</sup>)<sup>19</sup>  
116 and wild-type littermates (WT) mice on a C57BL/6J genetic background. Mice randomly assigned to  
117 the experimental groups were treated with the various ACEi at 10mg/Kg/day via the water bottle.

### *Blood pressure experiments*

118 WT (n=22) or Cx40<sup>-/-</sup> (n=18) mice were randomly divided into 3 groups: control, Enalapril and  
119 Zofenopril. Basal systolic blood pressure was measured for 4 days then treatments were initiated  
120 and SBP was measured for 10 more days. WT groups were done in parallel (n=22) with Cx40<sup>-/-</sup> (n=6)  
121 untreated mice. Cx40<sup>-/-</sup> groups (n=18) were done in parallel with WT untreated mice (n=6).

Wild type mice (n=12) were randomly divided into 3 groups: control (n=4), Quinapril (n=4) and Lisinopril (n=4). Basal systolic blood pressure was measured for 4 days then treatments were initiated and SBP was measured for 10 more days.

122 Systolic blood pressure (SBP) was monitored daily by non-invasive plethysmography tail cuff  
123 method (BP-2000, Visitech Systems Inc.) on conscious mice<sup>20</sup>.

#### *Mouse carotid artery stenosis model*

WT mice (n=26) were divided into 3 groups: ctrl (n=9), Enalapril (n=9) and zofenopril (n=8). Cx40<sup>-/-</sup> mice (n=24) were divided into 3 groups: ctrl (n=11), Enalapril (n=6) and zofenopril (n=7). Seven days post-treatment, intimal hyperplasia was induced via a carotid stenosis.

124 The carotid artery stenosis (CAS) was performed as previously published<sup>21</sup>. For surgery, mice  
125 were anesthetized with Ketamine 80mg/kg and Xylazine 15 mg/kg. The left carotid artery was  
126 located and separated from the jugular vein and vagus nerve. Then, a 7.0 PERMA silk (Johnson &  
127 Johnson AG, Ethicon, Switzerland) thread was looped under the artery and tightened around the  
128 carotid in presence of a 35-gauge needle. The needle was removed, thereby restoring blood flow,  
129 albeit leaving a significant stenosis<sup>21</sup>. Buprenorphine 0.05 mg/kg was provided as post-operative  
130 analgesic every 12h for 48 hours. Treatment with the ACEi of choice was continued for 28 days post-  
131 surgery until organ collection. In another set of surgeries, WT mice (n=17) were randomly divided  
132 into 3 groups: control (n=6), quinapril (n=6) and Lisinopril (n=5). Seven days post-treatment, intimal  
133 hyperplasia was induced via a carotid stenosis.

134 All mice were euthanized 28 days post-surgery under general anesthesia by cervical  
135 dislocation and exsanguination, perfused with PBS followed by buffered formalin 4% through the left  
136 ventricle, and carotids were taken for IH measurements.

137 All animal experimentation conformed to the *National Research Council: Guide for the Care  
138 and Use of Laboratory Animals*<sup>22</sup>. All animal care, surgery, and euthanasia procedures were  
139 approved by the Centre Hospitalier Universitaire Vaudois (CHUV) and the Cantonal Veterinary Office  
140 (Service de la Consommation et des Affaires Vétérinaires SCAV-EXPANIM, authorization number  
141 3258).

#### *Ex vivo static human vein culture and SMC culture*

142 Human veins segments were discarded tissue obtained during lower limb bypass surgery.  
143 Each native vein was cut into 7mm segments randomly distributed between conditions (D0, D7-Ctrl,  
144 D7-enalaprilat or D7-zofenoprilat). One segment (D0) was immediately flash frozen in liquid nitrogen  
145 or OCT compound and the other were maintained in culture for 7 days in RPMI-1640 Glutamax  
146 supplemented with 10 % FBS and 1% antibiotic solution (10,000 U/mL penicillin G, 10,000 U/mL  
147 streptomycin sulphate) at 37°C and 5% CO<sub>2</sub>, as previously described<sup>6</sup>. The cell culture medium was  
148 changed every 48 h with fresh ACEi. 6 different veins/patients were included in this study.

149 Human vascular smooth muscle cells (VSMC) were prepared and cultured from human  
150 saphenous vein segments as previously described<sup>6,19</sup>. The study protocols for organ collection and  
151 use were reviewed and approved by the Centre Hospitalier Universitaire Vaudois (CHUV) and the  
152 Cantonal Human Research Ethics Committee (<http://www.cer-vd.ch/>, no IRB number, Protocol  
153 Number 170/02), and are in accordance with the principles outlined in the Declaration of Helsinki of

154 1975, as revised in 1983 for the use of human tissues. 6 different veins/patients were used in this  
155 study to generate VSMC.

#### *Histomorphometry*

156 Left ligated carotids were isolated and paraffin-embedded. Six 6  $\mu\text{m}$  cross sections were  
157 collected every 100  $\mu\text{m}$  and up to 2 mm from the ligature, and stained with Van Gieson Elastic  
158 Lamina (VGEL) staining. For intimal and medial thickness, 72 (12 measurements/cross section on six  
159 cross sections) measurements were performed<sup>19</sup>. To account for the gradient of IH in relation to the  
160 distance from the ligature, the intima thickness was plotted against the distance to calculate the  
161 area under the curve of intima thickness. Mean intima and media thickness over the 2mm distance  
162 were calculated as well.

163 For human vein segments, after 7 days in culture, or immediately upon vein isolation (D0),  
164 segments were fixed in buffered formalin, embedded in paraffin and cut into 6  $\mu\text{m}$  sections, and  
165 stained with VGEL as previously described<sup>6</sup>. For intimal and medial thickness, 96 (4  
166 measurements/photos and 4 photos per cross section on six cross sections) measurements were  
167 performed<sup>19</sup>. Two independent researchers blinded to the conditions did the morphometric  
168 measurements using the Olympus Stream Start 2.3 software (Olympus, Switzerland)<sup>6, 19</sup>.

#### *Immunohistochemistry*

169 PCNA (proliferating cell nuclear antigen) immunohistochemistry was performed on paraffin  
170 sections as previously described<sup>6</sup> after antigen retrieval using TRIS-EDTA buffer, pH 9, 17 min in a  
171 microwave at 500 watts. Immunostaining was performed using the EnVision +/HRP, DAB+ system  
172 according to manufacturer's instructions (Dako, Switzerland), and counterstained with hematoxylin.  
173 One slide per series was assessed and 3 images per section were taken at 200x magnification. Two  
174 independent observers unaware of the conditions manually counted the PCNA and hematoxylin  
175 positive nuclei.

#### *Live-cell hydrogen sulfide measurement*

176 Free sulfide was measured in cells using 5  $\mu\text{M}$  SF<sub>7</sub>-AM fluorescent probe as previously  
177 described<sup>6</sup>. Fluorescence intensity ( $\lambda_{\text{ex}} = 495 \text{ nm}$ ;  $\lambda_{\text{em}} = 520 \text{ nm}$ ) was measured continuously in a  
178 Synergy Mx fluorescent plate reader (Biotek AG, Switzerland) at 37 °C before and after addition of  
179 various compounds, as indicated.

#### *Persulfidation protocol*

180 Persulfidation protocol was performed using a dimedone-based probe as recently  
181 described<sup>23</sup>. Flash-frozen liver was grinded into powder and 20mg of powder was homogenized in  
182 300 $\mu\text{l}$  of HEN buffer (100mM HEPES, 1mM EDTA, 100 $\mu\text{M}$  neocuproin, 1 vol. % NP-40, 1 wt. % SDS,  
183 proteases inhibitors) supplemented with 5mM 4-Chloro-7-nitrobenzofurazan. Proteins were  
184 extracted by methanol/chloroform/water protein precipitation and the pellet was resuspended in  
185 200 $\mu\text{l}$  of 50mM HEPES-2 wt. % SDS. Protein content was measured using Pierce BCA protein assay kit,  
186 and 75 $\mu\text{g}$  of proteins were incubated with 25 $\mu\text{M}$  final Daz-2-biotin for 1h in the dark at 37°C. Daz-2-  
187 biotin was prepared with 1mM Daz-2, 1mM alkynyl biotin, 2mM copper(II)-TBTA, 4mM ascorbic acid  
188 with overnight incubation at RT, followed by quenching with 20mM EDTA. Proteins were then  
189 extracted by Methanol/Chloroform/Water protein precipitation and the pellets resuspended in

190 150µl SDS lysis buffer. Protein concentration was measured using the DC protein assay, 10 µg were  
191 loaded on SDS-PAGE and the Biotin signal was measured by WB analyses using a streptavidin-HRP  
192 antibody. Protein abundance was normalized to total protein staining using Pierce™ Reversible  
193 Protein Stain Kit for PVDF Membranes.

#### *BrdU staining (VSMC proliferation)*

194 VSMC were grown at 80% confluence on glass coverslips in a 24-well plate and starved  
195 overnight in serum-free medium. Then, VSMC were either treated or not (ctrl) with the ACEi of  
196 choice for 24h in full medium (RPMI 10% FBS) in presence of 10µM BrdU. All conditions were tested  
197 in parallel. All cells were fixed in ice-cold methanol 100% after 24h of incubation and immunostained  
198 for BrdU. Images were acquired using a Nikon Eclipse 90i microscope. BrdU-positive nuclei and total  
199 DAPI-positive nuclei were automatically detected using the ImageJ software<sup>6</sup>.

#### *Wound healing assay (VSMC migration)*

200 VSMC were grown at confluence in a 12-well plate and starved overnight in serum-free  
201 medium. Then, a scratch wound was created using a sterile p200 pipette tip and medium was  
202 changed to full medium (RPMI 10% FBS). Repopulation of the wounded areas was recorded by  
203 phase-contrast microscopy over 24 hours in a Nikon Ti2-E live cell microscope. The area of the  
204 denuded area was measured at t=0h and t=10h after the wound using the ImageJ software by two  
205 independent observers blind to the conditions.

#### *Western blotting*

206 Human vein segments were washed twice in ice-cold PBS, flash-frozen in liquid nitrogen,  
207 grinded to power and resuspended in SDS lysis buffer (62.5 mM TRIS pH6.8, 5% SDS, 10 mM EDTA).

208 Vascular smooth muscle cells were kept in serum free media overnight. The next morning,  
209 complete media was added with the ACEinhibitors. Five hours post-treatment, cells were washed  
210 once with ice-cold PBS and directly lysed with Laemmli buffer. Lysates were resolved by SDS-PAGE  
211 and transferred to a PVDF membrane (Immobilon-P, Millipore AG, Switzerland). Immunoblot  
212 analyses were performed as previously described<sup>6</sup> using the antibodies described in the  
213 **Supplemental Table S1**. Blots were revealed by enhanced chemiluminescence (Immobilon, Millipore)  
214 using the ChemiDoc™ XRS+ System and analysed using the Image Lab (BETA2) software, version  
215 3.0.01 (Bio-Rad Laboratories, Switzerland).

#### *Statistical analyses*

216 All experiments were quantitatively analysed using GraphPad Prism® 8, and results are  
217 shown as mean ± SEM. Statistical test details are indicated in the Figure legends.

218

## 219 RESULTS

#### *Zofenopril and enalapril similarly lower systolic blood pressure of hypertensive mice*

220 Spontaneously hypertensive Cx40 deleted mice (Cx40<sup>-/-</sup>) and wild-type littermates (WT) were  
221 given either 10 mg/kg Zofenopril or 6 mg/kg Enalapril in the drinking water to achieve similar blood  
222 lowering effects on hypertensive Cx40<sup>-/-</sup> mice (**Figure 1A**). Zofenopril also lowered by 6mmHg SBP in



223 normotensive WT mice (**Figure 1B**). The ACEi Enalapril (**Figure 1B**), Quinapril (10 mg/kg) and  
224 Lisinopril (10 mg/kg) had no effect on SBP in WT mice (**Figure S1**).

#### *Zofenopril is superior to other ACEi in reducing IH in a mouse model of carotid artery stenosis*

225 As expected, the hypertensive mice developed twice more IH than their normotensive  
226 littermates following the carotid artery stenosis (CAS) model<sup>21</sup>. Enalapril had a non-specific tendency  
227 to reduce IH in Cx40<sup>-/-</sup> mice (I/M p>.99), while Zofenopril suppressed IH by 90% (I/M p=.0006; **Figure**  
228 **2, table S2**). Enalapril had no effect in normotensive WT mice (I/M p>.99), whereas Zofenopril also  
229 suppressed IH in those mice (I/M p=.008; **Figure 2, table S3**). The ACEi Quinapril and Lisinopril did  
230 not affect IH in WT mice (**Figure S2, table S4**).

#### *Zofenoprilat prevented the development of IH in human saphenous vein segments*

231 We next tested the effect of Zofenoprilat and Enalaprilat, the active compounds derived  
232 from pro-drugs Zofenopril and Enalapril, in our model of IH in *ex vivo* static vein culture<sup>6</sup>. Continuous  
233 treatment with 100  $\mu$ M Zofenoprilat, but not with Enalaprilat, fully blocked the development of IH  
234 observed in veins maintained for 7 days in culture in absence of blood flow (D7), compared to initial  
235 values in freshly isolated veins (D0) (**Figure 3, table S5**).

#### *Zofenoprilat released H<sub>2</sub>S.*

236 Besides its ACEi activity, Zofenopril has been proposed to work as an H<sub>2</sub>S donor<sup>16-18</sup>. *In vitro*  
237 time-lapse recording of the H<sub>2</sub>S-selective probe SF<sub>7</sub>-AM revealed that Zofenoprilat, but not  
238 Enalaprilat, slowly released H<sub>2</sub>S in RPMI medium, compared to the fast-releasing NaHS salt (**Figure**  
239 **4A**). Similar experiments in presence of live VSMC (**Figure 4B**) confirmed that Zofenoprilat, but not  
240 Enalaprilat, increased the SF<sub>7</sub>-AM signal.

241 The biological activity of H<sub>2</sub>S is mediated by post-translational modification of reactive  
242 cysteine residues by persulfidation, which modulates protein structure and/or function<sup>9, 23</sup>. We  
243 assessed protein persulfidation using a dimedone-based probe as recently described<sup>23</sup>. Zofenopril  
244 significantly increased protein persulfidation (PSSH) in liver extracts from mice treated with Enalapril  
245 or Zofenopril for two weeks (**Figure 4C**).

#### *Zofenopril decreased VSMC proliferation and migration*

246 As various H<sub>2</sub>S donors decrease VSMC proliferation in the context of IH<sup>6, 8</sup>, we next tested  
247 the effect of Zofenopril on VSMC. In the CAS model, Zofenopril, but not Enalapril, lowered cell  
248 proliferation in the carotid wall as assessed by PCNA staining (**Figure 5A-B**). Zofenoprilat further  
249 inhibited the proliferation and migration of primary human VSMC *in vitro*, while Enalaprilat had no  
250 effect on proliferation (**Figure 5C-D**) and reduced migration by 20% (**Figure 5E-F**). ACEi Lisinopril and  
251 Quinaprilat did not affect VSMC proliferation (**Figure S3**).

#### *Zofenoprilat inhibited the MAPK and mTOR pathways*

252 The MAPK and mTOR signalling pathways contribute to VSMC proliferation in the context of  
253 IH<sup>24</sup>. Western blot analyses revealed that Zofenoprilat reduced by 50% the levels of P-ERK1,2, P-p38  
254 and P-S6RP in cultured VSMC, while Enalaprilat had no effect (**Figure 6A-F**). Moreover, P-S6RP and P-  
255 ERK1,2 levels were also decreased by Zofenoprilat in human vein segments placed in culture for 7  
256 days (**Figure 6G-I**).

257

## 258 DISCUSSION

259 In this study, we hypothesized that Zofenopril, an ACEi with a free thiol moiety acting as an  
260 H<sub>2</sub>S donor, would be more efficient than other ACEi to inhibit IH in the context of hypertension. Not  
261 only Zofenopril is more potent than Enalapril in reducing IH in hypertensive Cx40<sup>-/-</sup> mice, it also  
262 suppresses IH in normotensive condition, where other ACEi have no effect. Furthermore, Zofenopril  
263 prevents IH in human saphenous vein segments in absence of blood flow. The effect of Zofenopril on  
264 IH correlates with reduced VSMC proliferation and migration and decreased activity of the MAPK  
265 and mTOR pathways.

266 Several pre-clinical studies have shown that that SBP-lowering medication such as ACEi  
267 reduce IH<sup>12</sup>, which prompt the large-scale MERCATOR/MARCATOR<sup>14, 15</sup> and PARIS clinical trials<sup>13</sup>.  
268 Here, we also observed that lowering SBP using the ACEi Enalapril had a non-significant tendency to  
269 protect from IH in hypertensive mice. However, Enalapril, Quinapril and Lisinopril, had no effect in  
270 normotensive WT mice. The fact that the sulhydrated ACEi Zofenopril almost abrogated IH in  
271 hypertensive and normotensive mice strongly supports that this ACEi provides additional effects  
272 independent of its ACEi activity, as previously suggested<sup>16-18</sup>. Of interest, the SMILE clinical trials  
273 concluded that, compared to placebo or Ramipril, Zofenopril reduces the 1-year risk of  
274 cardiovascular events after acute myocardial infarction<sup>25</sup>. These benefits might be related to H<sub>2</sub>S  
275 release by Zofenopril, as pre-clinical studies consistently show that H<sub>2</sub>S supplementation promote  
276 recovery after acute myocardial infarction<sup>4</sup>.

277 Zofenopril has been proposed to work as a H<sub>2</sub>S donor in several studies<sup>16-18</sup>. Here, we  
278 confirmed that Zofenoprilat releases detectable amounts of H<sub>2</sub>S. H<sub>2</sub>S modifies proteins by post-  
279 translational persulfidation (S-sulfhydration) of reactive cysteine residues, which modulate protein  
280 structure and/or function<sup>23</sup>. Here, we further observed that Zofenopril increases overall protein  
281 persulfidation *in vivo*, suggesting that Zofenopril generates H<sub>2</sub>S *in vivo* as well.

282 We and others previously demonstrated that various H<sub>2</sub>S donors inhibit VSMC proliferation<sup>6</sup>,  
283 <sup>8, 26</sup>. Consistently, we confirmed that Zofenopril inhibits VSMC proliferation and migration *in vitro*  
284 and reduces cell proliferation in the carotid wall *in vivo*. Although the exact mechanisms of action of  
285 Zofenoprilat and H<sub>2</sub>S remain to be elucidated, we demonstrated that Zofenoprilat inhibits the MAPK  
286 and mTOR signalling pathways, which contribute to VSMC proliferation and neointima formation<sup>24</sup>.  
287 Overall, our data strongly suggest that Zofenopril acts similarly to other known H<sub>2</sub>S donors to limit IH  
288 through inhibition of the MAPK and mTOR signalling pathways, leading to decreased VSMC  
289 proliferation and migration.

290 Overall, our data suggests that Zofenopril might show benefits against restenosis in patients  
291 unlike other ACEi. These findings raise the question as to whether the scientific community was not  
292 too quick to discard the whole class of ACEi as a treatment of restenosis based on the disappointing  
293 results of the MERCATOR/MARCATOR<sup>14, 15</sup> and PARIS trials<sup>13</sup>. In the last decade, many efforts have  
294 been put on the development of local drug delivery strategy, well adapted to endovascular  
295 interventions. However, this strategy seems to bring great improvement in the mid-term but not in  
296 the long-term follow-up<sup>2</sup>. Thus, a more chronic approach, sustaining the early effect on cell

297 proliferation and IH inhibition, should be encouraged. Such a strategy relies on oral medication,  
298 which is also better adapted to open surgery.

299 Nevertheless, our study carries some limitations.

300 Firstly, numerous oral drugs have been clinically tested over the years to limit restenosis and,  
301 in most trials, the pharmacologic treatment of restenosis failed to show positive results, despite  
302 promising results obtained in experimental models<sup>27</sup>. While there is no doubt that pre-clinical  
303 models have significantly advanced our understanding of the mechanisms of restenosis formation,  
304 none of them fully mimic restenosis in human. The genetic model of renin-dependent hypertension  
305 used in that study is also rarely observed in patients, which have complex multifactorial essential  
306 hypertension. Additional studies reflecting better the patients' comorbidities (dyslipidemia, renal  
307 insufficiency, smoking, atherosclerosis, etc..) with a vein bypass model and larger animal models, or  
308 small phase II clinical trial, are required before testing the benefits of Zofenopril in a large, phase III  
309 clinical trials.

310 Secondly, although Zofenopril was the only ACEi providing benefits in normotensive  
311 condition, we cannot exclude that other ACEi not tested here could work as well. We further  
312 acknowledge that pharmacokinetics and pharmacodynamics differences between Zofenopril and  
313 other ACEi may contribute to the superiority of Zofenopril. Zofenopril is more lipophilic and may  
314 have better tissue penetration than Enalapril or Ramipril, which may have an impact beyond the  
315 effect of H<sub>2</sub>S liberated by Zofenopril. However, it has been shown that vessel wall penetration of  
316 various ACEi is independent of lipophilia and that the endothelium constitutes no specific barrier for  
317 the passage of ACE inhibitors<sup>28</sup>.

318 Finally, our working hypothesis is that Zofenopril inhibits VSMC proliferation via direct  
319 release of H<sub>2</sub>S at the level of the media of vessel. However, we could not ascertain that H<sub>2</sub>S is  
320 released at the level of the VSMC. H<sub>2</sub>S<sup>9</sup> and Zofenoprilat<sup>17, 18</sup> have been shown to promote  
321 endothelial cell function, including proliferation and migration. Thus, we cannot exclude that  
322 Zofenopril limits IH via a positive effect on endothelial cells. Further studies are required to carefully  
323 assess the impact of Zofenopril on the endothelium and quantify H<sub>2</sub>S in vascular tissue.

#### 324 **Conclusion**

325 Under the conditions of these experiments, Zofenopril is superior to Enalapril in reducing IH  
326 and provides beneficial effect against IH in mice and in a model of IH in human vein segments *ex vivo*.  
327 Our data strongly support that Zofenopril limits the development of IH via H<sub>2</sub>S release,  
328 independently of its ACEi activity. The effects of Zofenopril correlate with reduced MAPK and mTOR  
329 pathways activities, leading to decreased VSMC proliferation and migration.

330 Given the number of patients treated with ACEi worldwide, these findings may have broad  
331 implications for the treatment of patients suffering from peripheral atherosclerotic disease  
332 undergoing revascularization, and beyond. Our results warrant further research to evaluate the  
333 benefits of Zofenopril in limiting restenosis and eventually prospective clinical trials to test the  
334 superiority of sulfhydrated ACEi on restenosis over other ACEi.

335

336 **Acknowledgements**

337 We thank Prof. Jacques-Antoine Haefliger for giving us the Cx40<sup>-/-</sup> mice. We thank the mouse  
338 pathology facility for their services in histology (<https://www.unil.ch/mpf>).

339

340 **Sources of Funding**

341 This work was supported by the following: The Swiss National Science Foundation (grant FN-  
342 310030\_176158 to FA and SD, to FA, SD and PZ00P3-185927 to AL) and the Union des Sociétés  
343 Suisses des Maladies Vasculaires (to SD), and the Novartis Foundation (to FA). The funding sources  
344 had no involvement in study design; in the collection, analysis and interpretation of data; in the  
345 writing of the report; and in the decision to submit the article for publication.

346

347 **Disclosures**

348 None

349

350 **REFERENCES**

351

1. Davies MG, Hagen PO. Reprinted article "Pathophysiology of vein graft failure: a review". *Eur J Vasc Endovasc Surg*. 2011;42 Suppl 1:S19-29. DOI: 10.1016/j.ejvs.2011.06.013.
2. Phillips J. Drug-eluting stents for PAD: what does (all) the data tell us? *J Cardiovasc Surg (Torino)*. 2019;60(4):433-8. DOI: 10.23736/S0021-9509.19.10965-2.
3. Islam KN, Polhemus DJ, Donnarumma E, Brewster LP, Lefer DJ. Hydrogen Sulfide Levels and Nuclear Factor-Erythroid 2-Related Factor 2 (NRF2) Activity Are Attenuated in the Setting of Critical Limb Ischemia (CLI). *J Am Heart Assoc*. 2015;4(5). DOI: 10.1161/JAHA.115.001986.
4. Zhang L, Wang Y, Li Y, Li L, Xu S, Feng X, et al. Hydrogen Sulfide (H<sub>2</sub>S)-Releasing Compounds: Therapeutic Potential in Cardiovascular Diseases. *Front Pharmacol*. 2018;9:1066. DOI: 10.3389/fphar.2018.01066.
5. Ma B, Liang G, Zhang F, Chen Y, Zhang H. Effect of hydrogen sulfide on restenosis of peripheral arteries after angioplasty. *Mol Med Rep*. 2012;5(6):1497-502. DOI: 10.3892/mmr.2012.853.
6. Longchamp A, Kaur K, Macabrey D, Dubuis C, Corpataux JM, Deglise S, et al. Hydrogen sulfide-releasing peptide hydrogel limits the development of intimal hyperplasia in human vein segments. *Acta Biomater*. 2019. DOI: 10.1016/j.actbio.2019.07.042.
7. Yang G, Li H, Tang G, Wu L, Zhao K, Cao Q, et al. Increased neointimal formation in cystathionine gamma-lyase deficient mice: role of hydrogen sulfide in alpha5beta1-integrin and matrix metalloproteinase-2 expression in smooth muscle cells. *J Mol Cell Cardiol*. 2012;52(3):677-88. DOI: 10.1016/j.yjmcc.2011.12.004.
8. Yang G, Wu L, Bryan S, Khaper N, Mani S, Wang R. Cystathionine gamma-lyase deficiency and overproliferation of smooth muscle cells. *Cardiovasc Res*. 2010;86(3):487-95. DOI: 10.1093/cvr/cvp420.
9. Li Z, Polhemus DJ, Lefer DJ. Evolution of Hydrogen Sulfide Therapeutics to Treat Cardiovascular Disease. *Circ Res*. 2018;123(5):590-600. DOI: 10.1161/CIRCRESAHA.118.311134.
10. Venermo M, Sprynger M, Desormais I, Bjorck M, Brodmann M, Cohnert T, et al. Editor's Choice - Follow-up of Patients After Revascularisation for Peripheral Arterial Diseases: A Consensus Document From the European Society of Cardiology Working Group on Aorta and Peripheral Vascular Diseases and the European Society for Vascular Surgery. *Eur J Vasc Endovasc Surg*. 2019;58(5):641-53. DOI: 10.1016/j.ejvs.2019.06.017.
11. Flu HC, Tamsma JT, Lindeman JH, Hamming JF, Lardenoye JH. A systematic review of implementation of established recommended secondary prevention measures in patients with PAOD. *Eur J Vasc Endovasc Surg*. 2010;39(1):70-86. DOI: 10.1016/j.ejvs.2009.09.027.
12. Osgood MJ, Harrison DG, Sexton KW, Hocking KM, Voskresensky IV, Komalavilas P, et al. Role of the renin-angiotensin system in the pathogenesis of intimal hyperplasia: therapeutic potential for prevention of vein graft failure? *Ann Vasc Surg*. 2012;26(8):1130-44. DOI: 10.1016/j.avsg.2011.12.001.

13. Meurice T, Bauters C, Hermant X, Codron V, VanBelle E, Mc Fadden EP, et al. Effect of ACE inhibitors on angiographic restenosis after coronary stenting (PARIS): a randomised, double-blind, placebo-controlled trial. *Lancet*. 2001;357(9265):1321-4. DOI: 10.1016/S0140-6736(00)04518-9.
14. Does the new angiotensin converting enzyme inhibitor cilazapril prevent restenosis after percutaneous transluminal coronary angioplasty? Results of the MERCATOR study: a multicenter, randomized, double-blind placebo-controlled trial. Multicenter European Research Trial with Cilazapril after Angioplasty to Prevent Transluminal Coronary Obstruction and Restenosis (MERCATOR) Study Group. *Circulation*. 1992;86(1):100-10. DOI: 10.1161/01.cir.86.1.100.
15. Faxon DP. Effect of high dose angiotensin-converting enzyme inhibition on restenosis: final results of the MARCATOR Study, a multicenter, double-blind, placebo-controlled trial of cilazapril. The Multicenter American Research Trial With Cilazapril After Angioplasty to Prevent Transluminal Coronary Obstruction and Restenosis (MARCATOR) Study Group. *J Am Coll Cardiol*. 1995;25(2):362-9. DOI: 10.1016/0735-1097(94)00368-z.
16. Bucci M, Vellecco V, Cantalupo A, Brancaleone V, Zhou Z, Evangelista S, et al. Hydrogen sulfide accounts for the peripheral vascular effects of zofenopril independently of ACE inhibition. *Cardiovasc Res*. 2014;102(1):138-47. DOI: 10.1093/cvr/cvu026.
17. Monti M, Terzuoli E, Ziche M, Morbidelli L. H<sub>2</sub>S dependent and independent anti-inflammatory activity of zofenoprilat in cells of the vascular wall. *Pharmacol Res*. 2016;113(Pt A):426-37. DOI: 10.1016/j.phrs.2016.09.017.
18. Terzuoli E, Monti M, Vellecco V, Bucci M, Cirino G, Ziche M, et al. Characterization of zofenoprilat as an inducer of functional angiogenesis through increased H<sub>2</sub>S availability. *Br J Pharmacol*. 2015;172(12):2961-73. DOI: 10.1111/bph.13101.
19. Allagnat F, Haefliger JA, Lambelet M, Longchamp A, Berard X, Mazzolai L, et al. Nitric Oxide Deficit Drives Intimal Hyperplasia in Mouse Models of Hypertension. *Eur J Vasc Endovasc Surg*. 2016;51(5):733-42. DOI: 10.1016/j.ejvs.2016.01.024.
20. Le Gal L, Alonso F, Wagner C, Germain S, Nardelli Haefliger D, Meda P, et al. Restoration of connexin 40 (Cx40) in Renin-producing cells reduces the hypertension of Cx40 null mice. *Hypertension*. 2014;63(6):1198-204. DOI: 10.1161/HYPERTENSIONAHA.113.02976.
21. Tao M, Mauro CR, Yu P, Favreau JT, Nguyen B, Gaudette GR, et al. A simplified murine intimal hyperplasia model founded on a focal carotid stenosis. *Am J Pathol*. 2013;182(1):277-87. DOI: 10.1016/j.ajpath.2012.10.002.
22. National Research Council (U.S.). Committee for the Update of the Guide for the Care and Use of Laboratory Animals., Institute for Laboratory Animal Research (U.S.), National Academies Press (U.S.). Guide for the care and use of laboratory animals. 8th ed. Washington, D.C.: National Academies Press; 2011. xxv, 220 p. p.
23. Zivanovic J, Kouroussis E, Kohl JB, Adhikari B, Bursac B, Schott-Roux S, et al. Selective Persulfide Detection Reveals Evolutionarily Conserved Antiaging Effects of S-Sulfhydration. *Cell Metab*. 2019;30(6):1152-70 e13. DOI: 10.1016/j.cmet.2019.10.007.
24. Owens GK, Kumar MS, Wamhoff BR. Molecular regulation of vascular smooth muscle cell differentiation in development and disease. *Physiol Rev*. 2004;84(3):767-801. DOI: 10.1152/physrev.00041.2003.

25. Borghi C, Omboni S, Novo S, Vinereanu D, Ambrosio G, Ambrosioni E. Efficacy and Safety of Zofenopril Versus Ramipril in the Treatment of Myocardial Infarction and Heart Failure: A Review of the Published and Unpublished Data of the Randomized Double-Blind SMILE-4 Study. *Adv Ther.* 2018;35(5):604-18. DOI: 10.1007/s12325-018-0697-x.
26. Wang Y, Wang X, Liang X, Wu J, Dong S, Li H, et al. Inhibition of hydrogen sulfide on the proliferation of vascular smooth muscle cells involved in the modulation of calcium sensing receptor in high homocysteine. *Exp Cell Res.* 2016;347(1):184-91. DOI: 10.1016/j.yexcr.2016.08.004.
27. Seedial SM, Ghosh S, Saunders RS, Suwanabol PA, Shi X, Liu B, et al. Local drug delivery to prevent restenosis. *J Vasc Surg.* 2013;57(5):1403-14. DOI: 10.1016/j.jvs.2012.12.069.
28. Raasch W, Dendorfer A, Ball B, Dominiak P. The lipophilic properties of angiotensin I-converting enzyme inhibitors do not influence their diffusion through cultured endothelium. *Jpn J Pharmacol.* 1999;81(4):346-52. DOI: 10.1254/jjp.81.346.

352

353

354 FIGURE LEGENDS

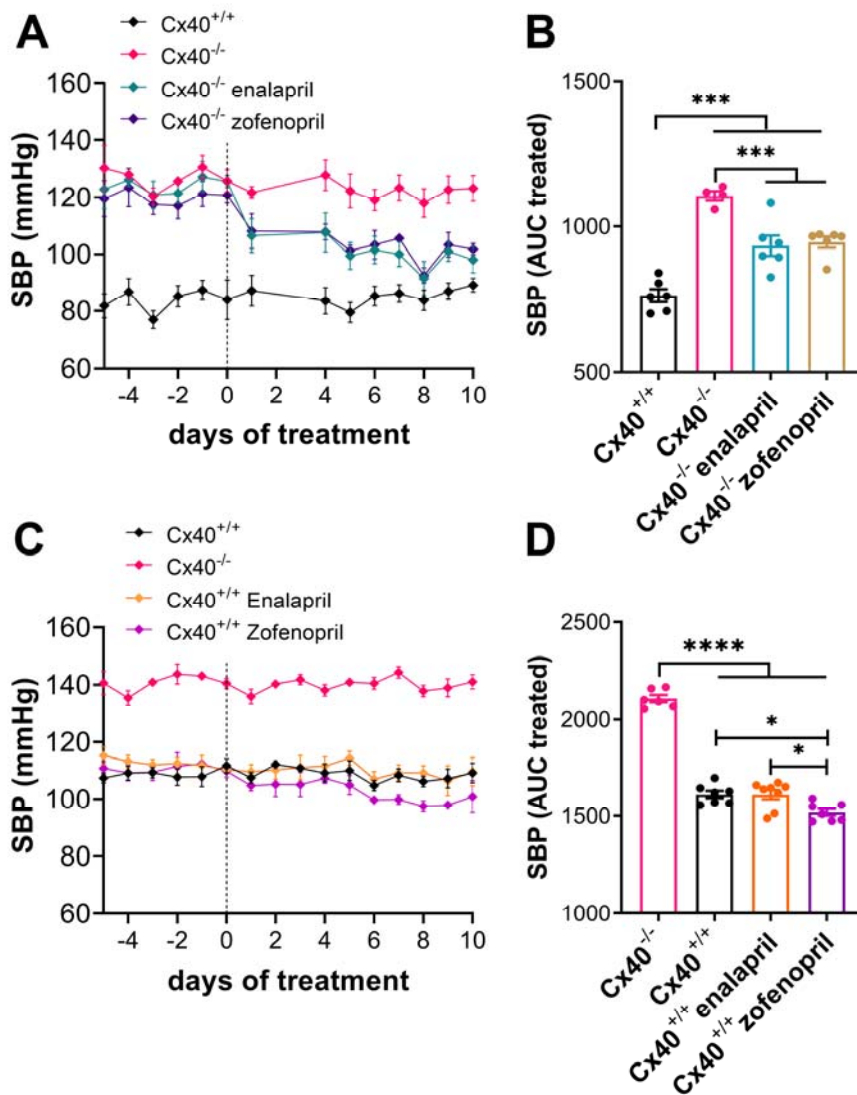

**Figure 1: Zofenopril and Enalapril similarly lower systolic blood pressure in hypertensive Cx40<sup>-/-</sup> mice**

**A)** Daily systolic blood pressure (SBP) values (mean±SEM) in WT (n=6) vs. Cx40<sup>-/-</sup> mice treated or not (n=5) with 10mg/kg Zofenopril (n=6) and 10mg/kg Enalapril (n=6) for the indicated time. **B)** Area under the curve (AUC) of SBP from day 0 to 10. **C)** Daily systolic blood pressure values (mean±SEM) in Cx40<sup>-/-</sup> (n=5) vs. WT mice treated or not (n=6) with Zofenopril (n=8) and Enalapril (n=8) for the indicated time. **D)** Area under the curve (AUC) of SBP between day 0 to 10. \*p<.05; \*\*p<.01; \*\*\*p<.001 as indicated from one-way ANOVA with Tukey's correction of multiple comparisons.



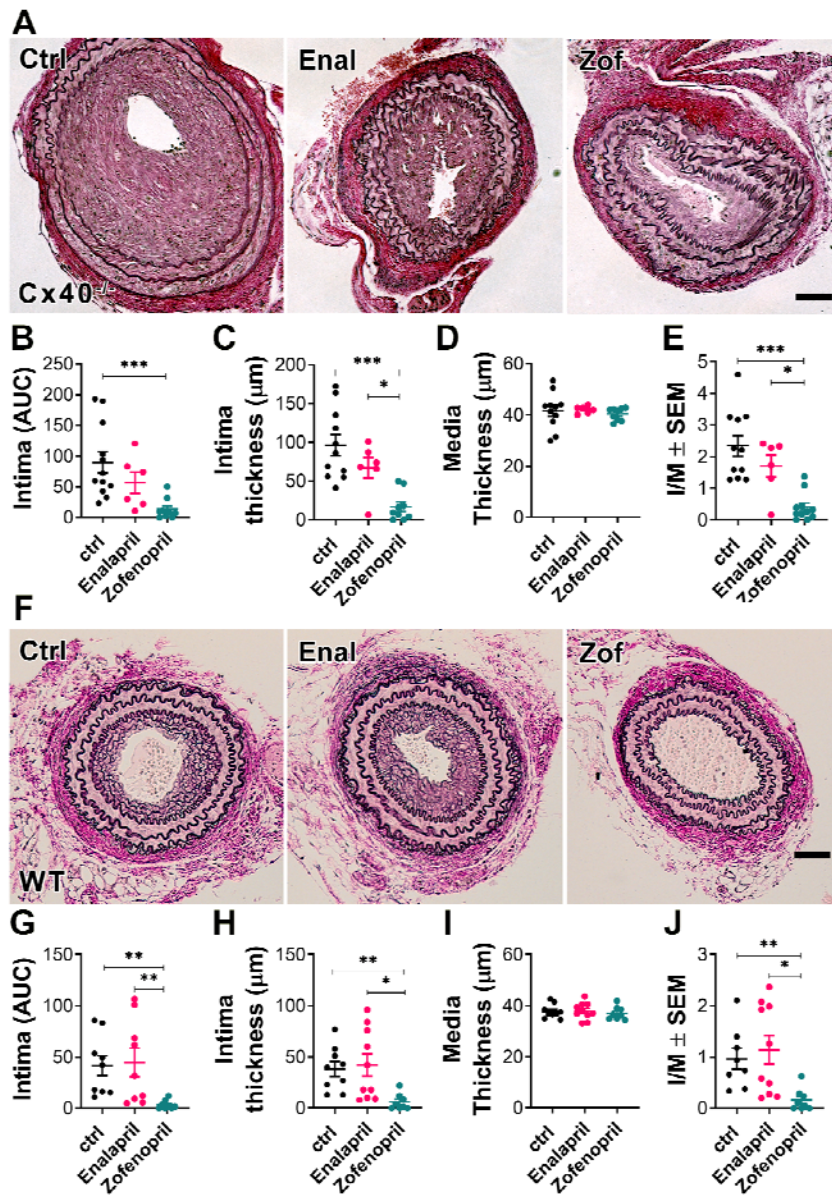

**Figure 2. Zofenopril treatment reduces IH in a mouse model of carotid artery stenosis**

Cx40<sup>-/-</sup> (A-E) or WT mice (F-J), treated or not (Ctrl) with Zofenopril (Zof) and Enalapril (Enal), were submitted to carotid artery stenosis. A, F) Representative images of left carotid cross sections stained with VGEL 28 days post-surgery in Cx40<sup>-/-</sup> (A) or WT (F) mice. Scale bar represents 40 µm. B-E, G-I) Morphometric measurements of area under the curve (AUC) of intima thickness (B, G) intima thickness (C, H), media thickness (D, I) and intima over media ratio (E, J). Data are presented as scatter plots of 9 to 12 animals per group, with mean±SEM. \*p<.05; \*\*p<.01; \*\*\*p<.001 as indicated from Kruskal-Wallis test followed by Dunn's multiple comparisons tests.

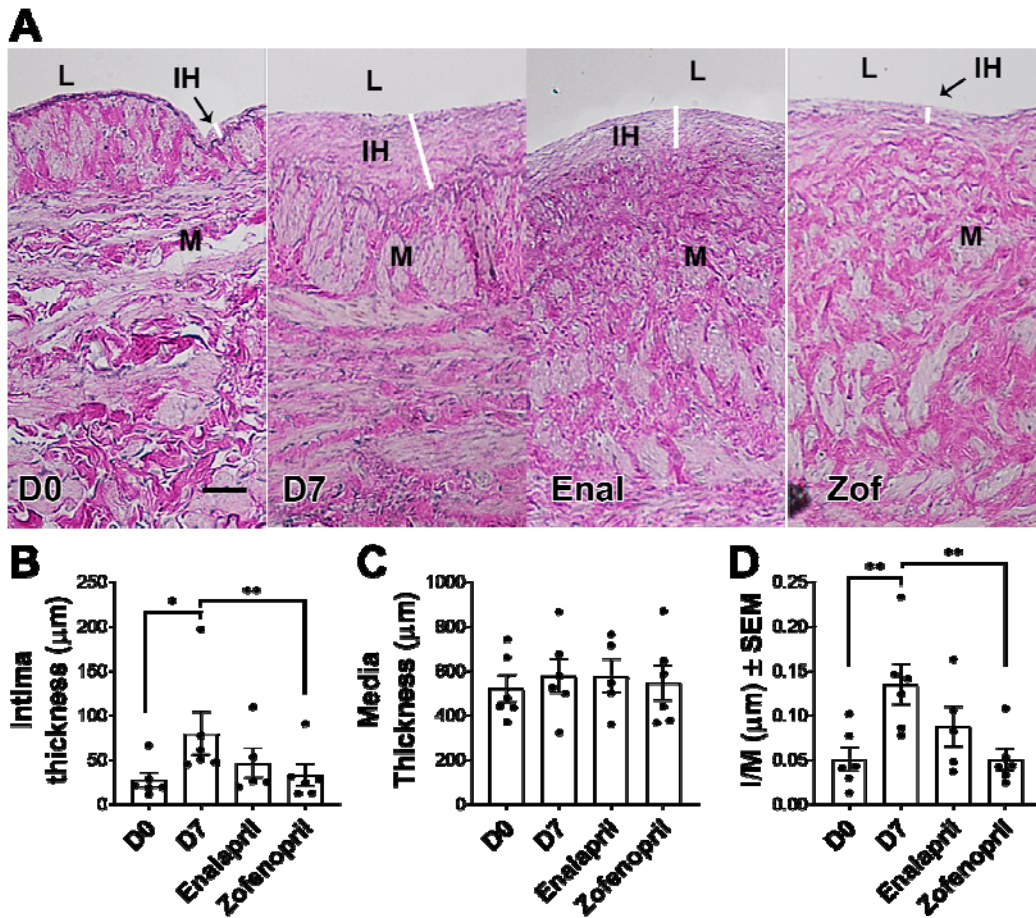

**Figure 3: Ex vivo treatment with Zofenoprilat prevents the development of IH in human saphenous vein segments**

Human great saphenous vein segments obtained from donors who underwent lower limb bypass surgery were put or not (D0, n=6) in static culture for 7 days in presence or not (D7, n=6) of 100µM of Zofenoprilat (n=6) or Enalaprilat (n=5). **A**) Representative VGEL staining. Scale bar= 50µm. **B-D**) Morphometric measurements of intima thickness (**B**), media thickness (**C**) and intima over media ratio (**D**). Data are presented as scatter plots of 6 different vein/patient with mean±SEM. \*p<.05; \*\*p<.01 as indicated from repeated measures one-way ANOVA with post-hoc t-test with Dunnet's correction of multiple comparisons.

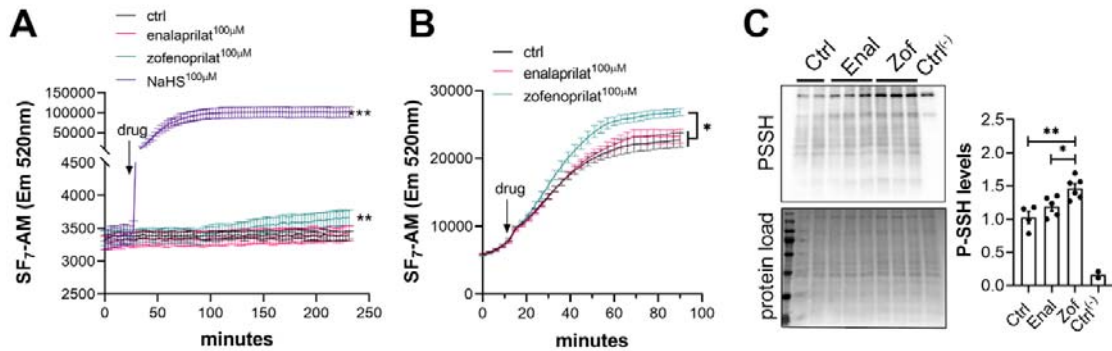

**Figure 4. Zofenoprilat release H<sub>2</sub>S as measured by SF<sub>7</sub>-AM fluorescent probe**

**A-B)** SF<sub>7</sub>-AM fluorescent signal (mean ± SEM) in a cell free assay in RPMI medium (**A**), in live primary VSMC (**B**) exposed or not (Ctrl) to 100 μM NaHS, 100 μM Zofenoprilat or 100 μM Enalaprilat for the indicated time. \*p<.05; \*\*p<.01; \*\*\*p<.001 vs. respective ctrl as determined by repeated measures two-way ANOVA with post-hoc t-test with Tukey's correction for multiple comparisons. Data are representative of 3 individual experiments. **C)** Global protein persulfidation (PSSH; labelled with DAz-2:Biotin as a switching agent) over total proteins in liver extracts from C57BL/6J male mice treated for two weeks with Enalapril or Zofenopril. Data are presented as scatter plots of 5 to 6 animals/group with mean±SEM with \*p<.05, \*\*p<.01, as determined by one-way ANOVA with post-hoc t-test with Tukey's correction for multiple comparisons.

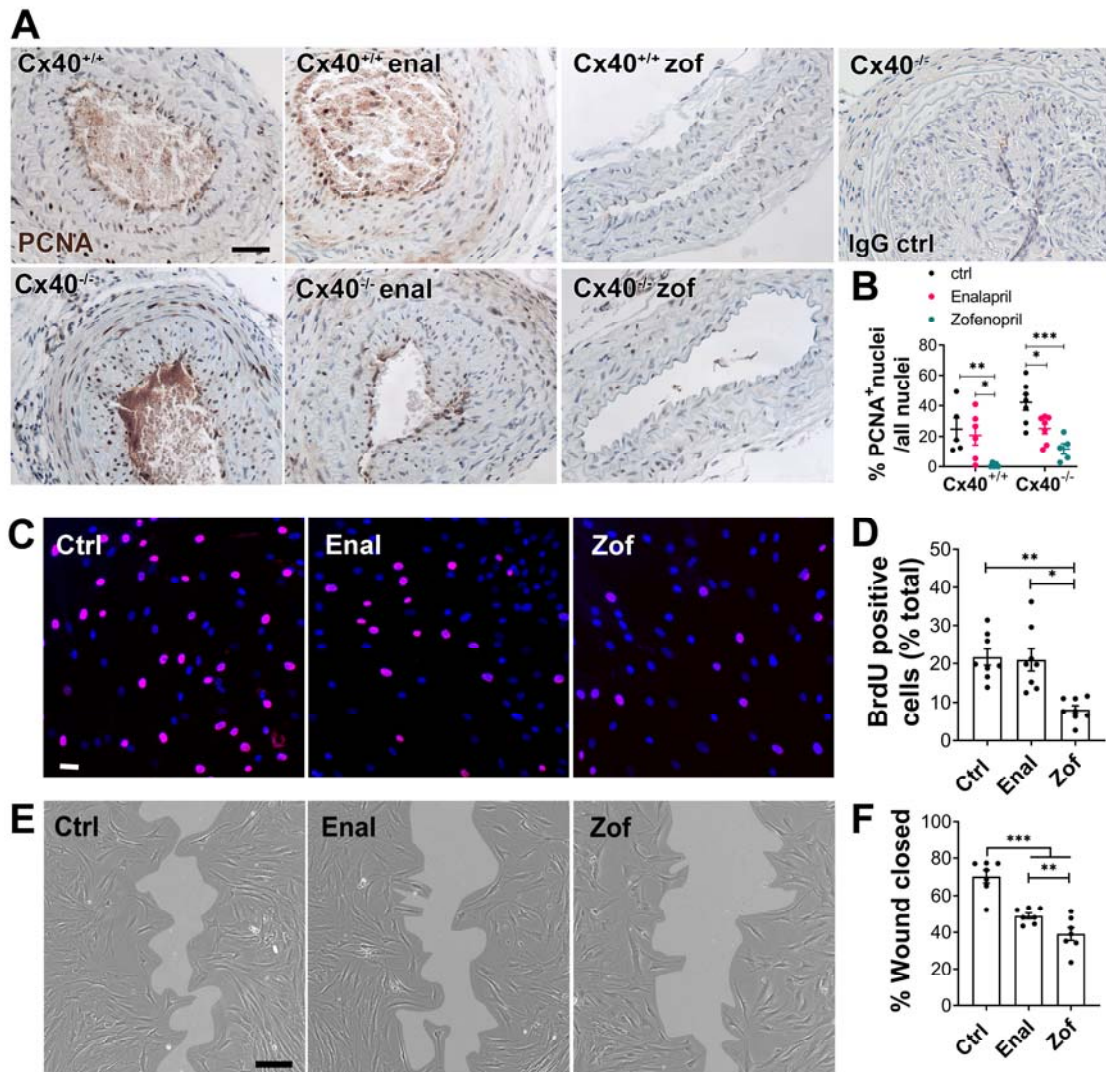

**Figure 5. Zofenopril treatment reduces cell proliferation in a mouse model of carotid artery stenosis**

**A-B)** PCNA immunostaining 28 days post carotid artery stenosis in WT (Cx40<sup>+/+</sup>) or Cx40<sup>-/-</sup> mice treated or not (Ctrl) with Zofenopril (Zof) and Enalapril (Enal). **A)** Representative images of PCNA-positive nuclei (brown) and negative nuclei (haematoxylin-stained blue nuclei). Scale bar represents 40  $\mu$ m. **B)** Quantitative assessment of PCNA positive cells over total cells of 5 to 8 animals/group with mean $\pm$ SEM. \* $p$ <.05; \*\* $p$ <.01; \*\*\* $p$ <.001, as determined by two-way ANOVA with post-hoc t-test with Sidak's correction of multiple comparisons. **C-D)** Primary human vascular smooth muscle cells (VSMC) were exposed or not (Ctrl) to 100  $\mu$ M Zofenoprilat or Enalaprilat for 24 h in presence of BrdU. **C)** Representative images of BrdU-positive nuclei (pink) and DAPI-stained nuclei (blue). Bar scale represents 10  $\mu$ m. **D)** Proliferation was calculated as the percentage of BrdU-positive nuclei over total nuclei. Data are scatter plots of 8 independent experiments with mean $\pm$ SEM with \* $p$ <.05, \*\* $p$ <.01, as determined by repeated measures one-way ANOVA with post-hoc t-test with Dunnet's correction for multiple comparisons. **E-F)** Wound healing assay with VSMC exposed or not (Ctrl) to

100  $\mu$ M Zofenoprilat or Enalaprilat. E) Representative images of VSMC in brightfield 10 hours post wound. Scale bar represents 50  $\mu$ m. F) Data are scatter plots of 7 independent experiments with mean $\pm$ SEM of wound area after 10h, expressed as a percentage of the initial wound area. \*\* $p$ <.01, \*\*\* $p$ <.001, as determined by repeated measures one-way ANOVA with post-hoc t-test with Dunnet's correction for multiple comparisons.

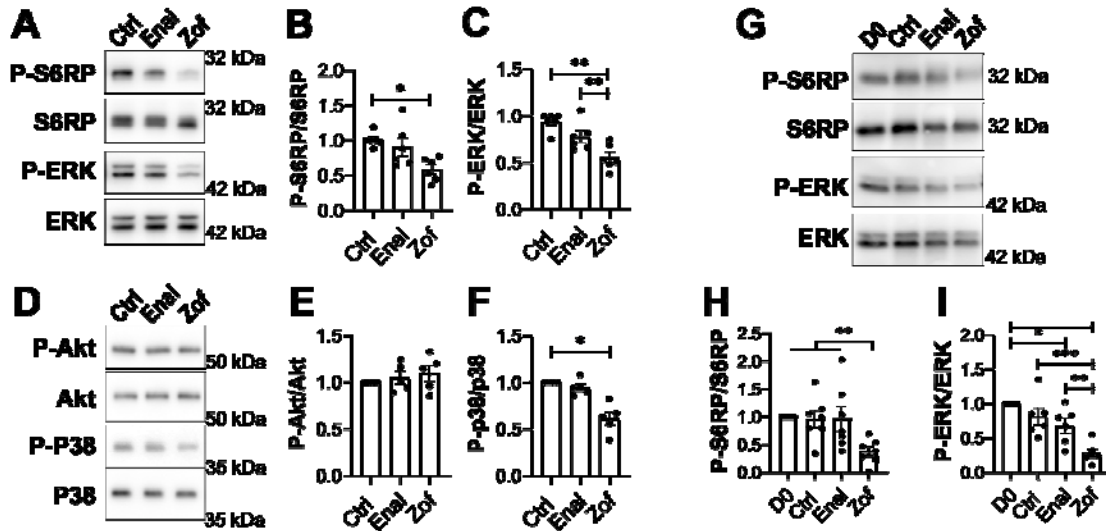

**Figure 6: Zofenoprilat inhibits ERK and S6RP phosphorylation**

A-F) Western Blot analyses from VSMC exposed or not (Ctrl) to 100  $\mu$ M Zofenoprilat or Enalaprilat for 5h. A, D) Representative Western Blot for P-S6RP and total S6RP, P-ERK and total ERK, P-Akt and total Akt, P-p38 and total p38. B-C; E-F) Quantitative assessment of 6 independent experiments, normalized to their respective ctrl condition, with mean $\pm$ SEM. \* $p$ <.05, \*\* $p$ <.01, as determined by repeated measures one-way ANOVA with post-hoc t-test with Dunnet's correction for multiple comparisons. G-I) Western Blot analyses from human vein segments exposed or not (Ctrl) to 100  $\mu$ M Zofenoprilat or Enalaprilat for 7 days. G) Representative Western Blot for P-S6RP and total S6RP, P-ERK and total ERK. H-I) Quantitative assessment of 7 different veins, normalized to their respective ctrl condition, with mean $\pm$ SEM. \* $p$ <.05, \*\* $p$ <.01, \*\*\* $p$ <.001, as determined by repeated measures one-way ANOVA with post-hoc t-test with Dunnet's correction for multiple comparisons.
